# Supplementary material
Source: PubMed Central journal article supplement (PMC4846589)

## Supplementary Material

**Supplementary Figure 1. Normalized CT and hematoma location overlap.** (A) The mean normalized CT image from all subjects, indicating good across-subject alignment in stereotactic space. (B) Overlap map of hematoma locations for all subjects. Brighter colors indicate more subjects with hematoma encompassing that location.

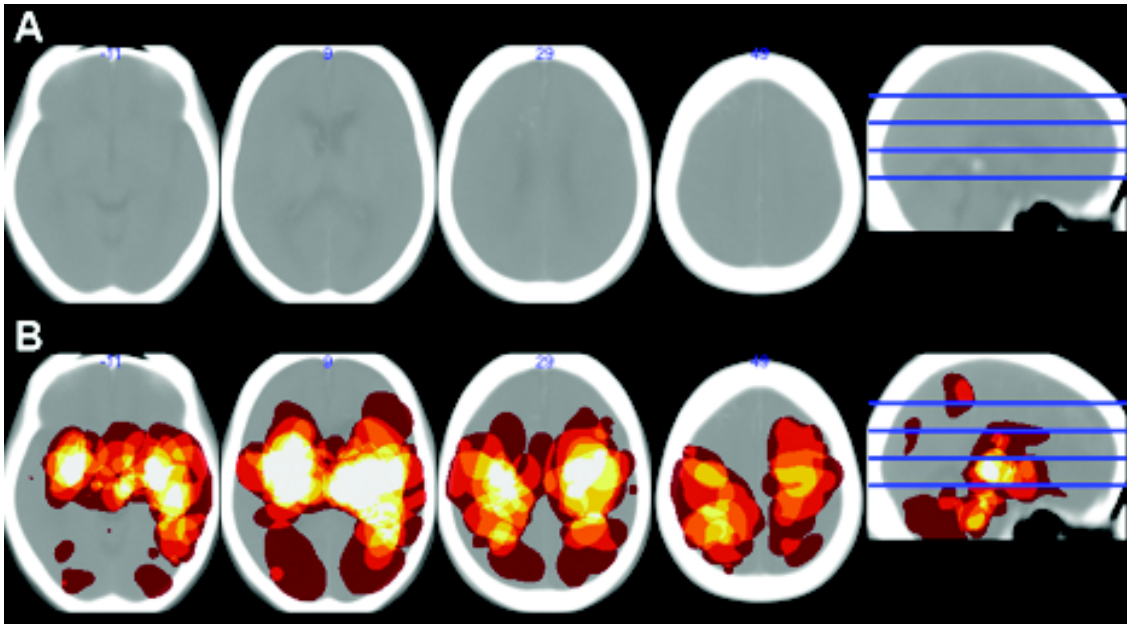

Supplement: NIHMS733581-supplement-12028_2015_210_MOESM1_ESM.pdf [file NIHMS733581-supplement-12028_2015_210_MOESM1_ESM.pdf]
